# Supplementary material for: Associations between Free Sugar and Sugary Beverage Intake in Early Childhood and Adult NAFLD in a Population-Based UK Cohort
Source: PubMed Central journal article supplement (PMC8068295; doi:10.3390/children8040290), 2021-04-08
Supplement: children-08-00290-s001.pdf [file children-08-00290-s001.pdf]

Supplementary

**Table S1.** Sugary beverage intake per day at 3 years and mild to severe hepatic steatosis at 24 years in the ALSPAC cohort.

| Model | n    | continuous SB/day |        |      | <1/day | 1-2/day |        | >2/day |        |      |      |
|-------|------|-------------------|--------|------|--------|---------|--------|--------|--------|------|------|
|       |      | OR                | 95% CL |      | REF    | OR      | 95% CL | OR     | 95% CL |      |      |
| 1     | 3088 | 1.02              | 0.89   | 1.16 | 1.00   | 0.99    | 0.78   | 1.26   | 0.95   | 0.71 | 1.26 |
| 2     | 2739 | 1.05              | 0.91   | 1.21 | 1.00   | 0.96    | 0.74   | 1.24   | 0.96   | 0.70 | 1.31 |
| 3     | 2715 | 0.99              | 0.83   | 1.17 | 1.00   | 0.84    | 0.62   | 1.13   | 0.81   | 0.57 | 1.16 |
| 4     | 2682 | 1.05              | 0.91   | 1.22 | 1.00   | 0.98    | 0.75   | 1.27   | 0.97   | 0.71 | 1.33 |

Model 1: adjusts for total energy intake. Model 2: model 1 + sex, maternal education, maternal pre-pregnancy body mass index, and breastfeeding duration. Model 3: model 2 + body mass index category at 24 years. Model 4: model 2 + AUDIT-C (Alcohol Use Disorder Identification Test – Concise) score at 24 years. Abbreviations: ALSPAC = Avon Longitudinal Study of Parents and Children, SB = sugary beverages, OR = odds ratio, CL = confidence limits.

**Table S2.** Adjusted <sup>1</sup> associations between free sugar percent quintiles at 3 years and severe hepatic steatosis at 24 years with and without total energy intake in the ALSPAC cohort.

|                    | n    | Q1<br>(0.14–11.5) |      | Q2<br>(11.5–13.5) |      | Q3<br>(13.5–15.3) |      | Q4<br>(15.3–17.7) |      | Q5<br>(17.7–36.6) |      | Per quintile |      | p-trend |      |      |      |      |
|--------------------|------|-------------------|------|-------------------|------|-------------------|------|-------------------|------|-------------------|------|--------------|------|---------|------|------|------|------|
|                    |      | REF               | OR   | 95% CL            | OR   | 95% CL            | OR   | 95% CL            | OR   | 95% CL            | OR   | 95% CL       |      |         |      |      |      |      |
| No TEI adjust-ment | 2742 | 1.00              | 0.82 | 0.54              | 1.24 | 0.99              | 0.66 | 1.48              | 1.02 | 0.69              | 1.52 | 1.11         | 0.75 | 1.65    | 1.05 | 0.95 | 1.14 | 0.35 |
| TEI adjust-ment    | 2742 | 1.00              | 0.81 | 0.53              | 1.23 | 0.98              | 0.65 | 1.47              | 1.01 | 0.67              | 1.50 | 1.09         | 0.73 | 1.62    | 1.04 | 0.95 | 1.14 | 0.39 |

<sup>1</sup>Both models are also adjusted for sex, maternal education, maternal pre-pregnancy body mass index, and breastfeeding duration. Abbreviations: ALSPAC = Avon Longitudinal Study of Parents and Children, TEI = total energy intake, OR = odds ratio, CL = confidence limits.

**Table S3.** Adjusted <sup>1</sup> associations between sugary beverage intake at 3 years and severe hepatic steatosis at 24 years with and without total energy intake in the ALSPAC cohort.

|                    | n    | continuous SB/day |        | <1/day | 1-2/day |        | >2/day |        |      |      |      |
|--------------------|------|-------------------|--------|--------|---------|--------|--------|--------|------|------|------|
|                    |      | OR                | 95% CL | REF    | OR      | 95% CL | OR     | 95% CL |      |      |      |
| NO TEI adjust-ment | 2739 | 1.05              | 0.87   | 1.26   | 1.00    | 1.18   | 0.82   | 1.71   | 1.21 | 0.79 | 1.85 |

|                     |      |      |      |      |      |      |      |      |      |      |      |
|---------------------|------|------|------|------|------|------|------|------|------|------|------|
| TEI ad-<br>justment | 2739 | 1.04 | 0.86 | 1.25 | 1.00 | 1.18 | 0.81 | 1.70 | 1.19 | 0.77 | 1.83 |
|---------------------|------|------|------|------|------|------|------|------|------|------|------|

<sup>1</sup>Both models are also adjusted for sex, maternal education, maternal pre-pregnancy body mass index, and breastfeeding duration. Abbreviations: ALSPAC = Avon Longitudinal Study of Parents and Children, SB = sugary beverages, TEI = total energy intake, OR = odds ratio, CL = confidence limits.
